# Supplementary material for: Novel compound mutations in the mitochondrial translation elongation factor (TSFM) gene cause severe cardiomyopathy with myocardial fibro-adipose replacement
Source: PubMed Central journal article supplement (PMC6434145; doi:10.1038/s41598-019-41483-9), 2019-03-25
Supplement: 41598_2019_41483_MOESM1_ESM.pdf [file 41598_2019_41483_MOESM1_ESM.pdf]

## SUPPLEMENTARY INFORMATIONS

**Manuscript title: Novel compound mutations in the mitochondrial translation elongation factor (*TSM*) gene cause severe cardiomyopathy with myocardial fibro-adipose replacement**

Autyhors: Elena Perli, Annalinda Pisano, Ruth I.C. Glasgow, Miriam Carbo, Steven A. Hardy, Gavin Falkous, Langping He, Bruna Cerbelli, Maria Gemma Pignataro, Elisabetta Zacara, Federica Re, Paola Lilla Della Monica, Veronica Morea, Penelope E. Bonnen, Robert W. Taylor, Giulia d'Amati, Carla Giordano

## Supplementary Figure S1

**A**

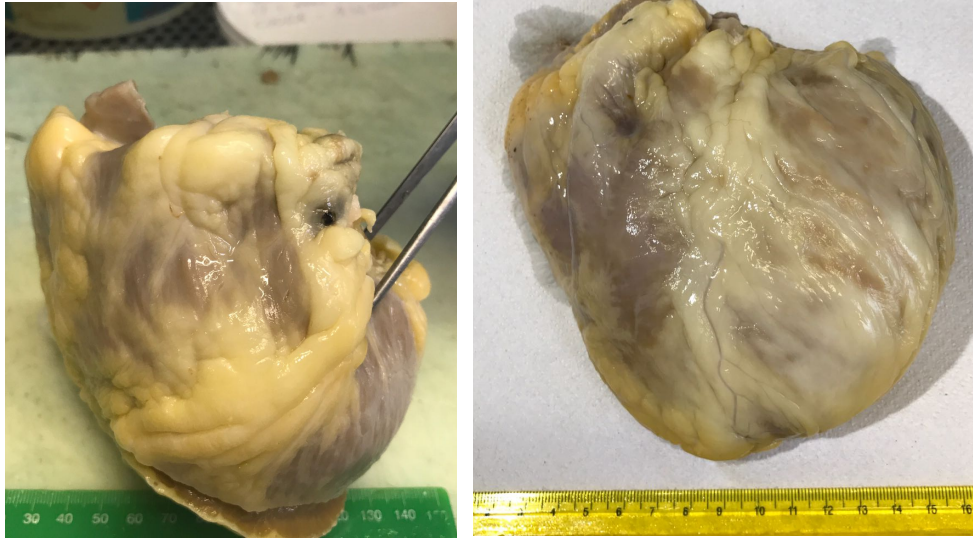

**B**

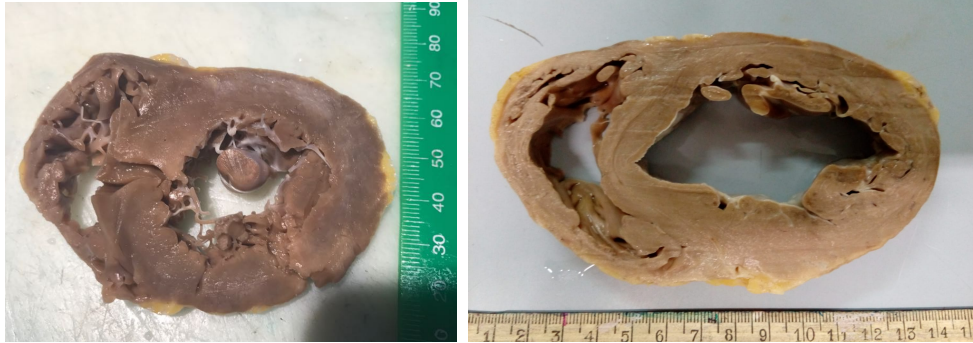

**C**

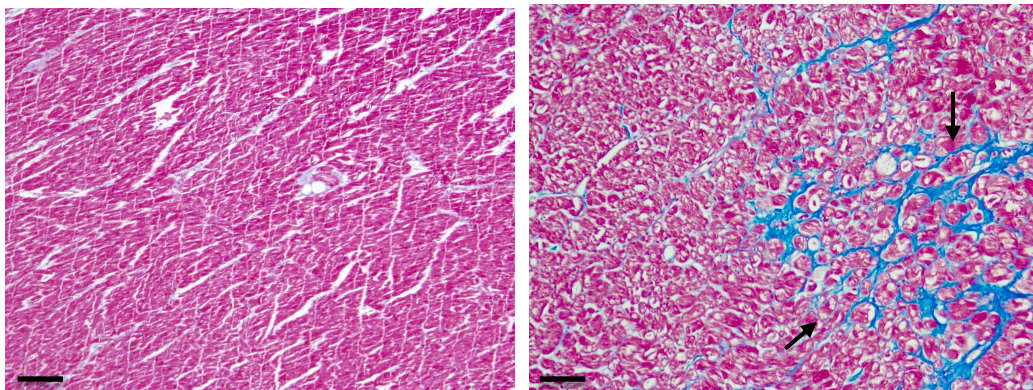

### Supplementary Figure S1. Gross and histologic features of non-failing and failing hearts.

**A.** Frontal view of a non-failing (NFH, left side) and a failing heart (FH, right side) with dilated cardiomyopathy. **B.** Cross section of NFH (left) and FH (right). FH shows biventricular eccentric hypertrophy (i.e. increased mass with biventricular chamber dilation), in absence of myocardial scarring.

**C.** Histologic picture of the left myocardium highlight the absence of fibrosis in NFH (left side) while FH is characterized by interstitial collagen deposition (in blue, arrows) (Masson trichrome stain, scale bar 250 $\mu$ m)

## Supplementary Figure S2

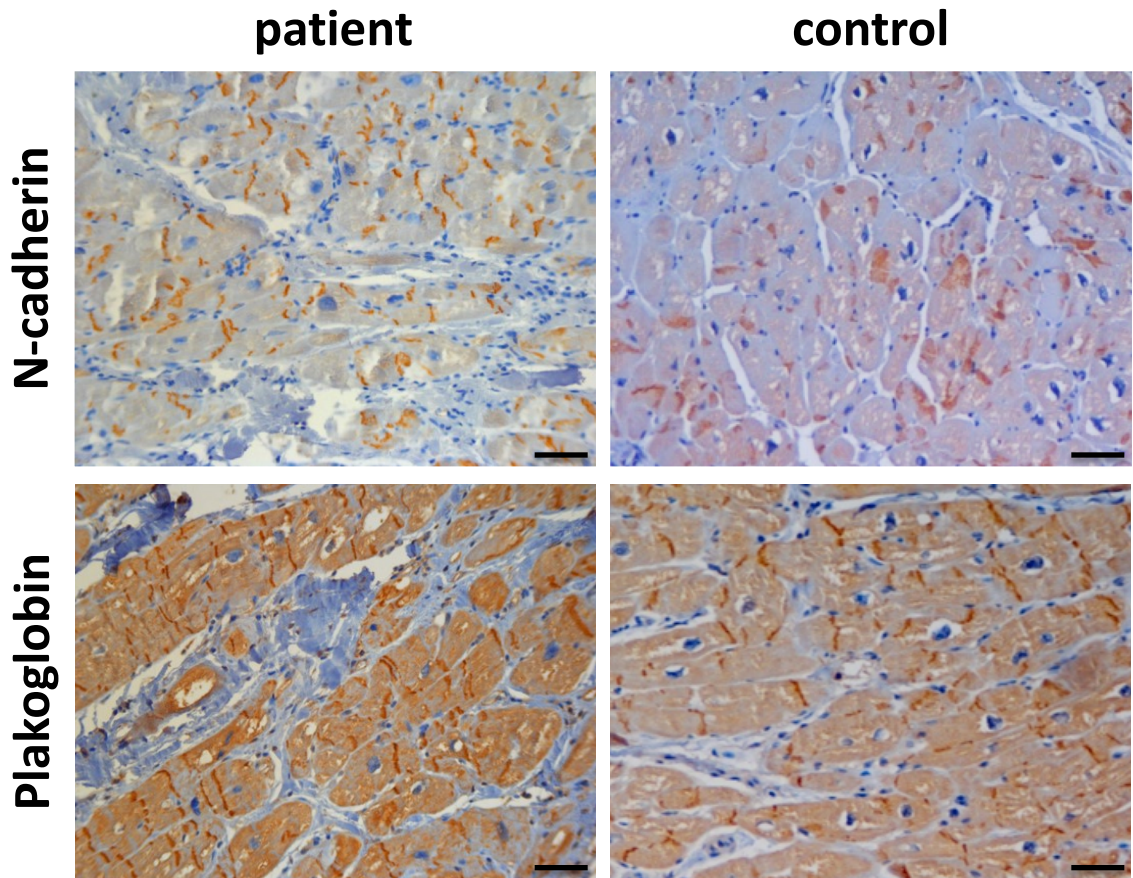

### Supplementary Figure S2

Expression of N-cadherin and Plakoglobin on cardiac tissue.

Scale bar 50 $\mu$ m



### **Supplementary Figure S3. Conservation of leucine residues at positions 137 and 169 of EF-Ts**

**isoform 1. A.** Number of occurrence of each amino acid at selected sequence positions in the 3,945 sequences of EF-TS homologues from different species present in the multiple sequence alignment (MSA) analysed in this work (see Materials and Methods). In the left column, amino acids are indicated by one-letter code, and deletions (gaps) by the “.” symbol. For clarity, only the alignment regions 114-124 and 224-234, corresponding to 132-142 and 164-174 of EF-TS isoform-1, are shown. Red boxes and font highlight: i) MSA positions 119 and 229, which correspond to 137 and 169 of EF-Ts isoform-1; ii) Amino acids leucine, which is present at positions 137 and 169 of wild-type EF-Ts isoforms, and glycine and phenylalanine, which are present in EF-Ts variants studied in this work, namely p.(Leu137Glyfs\*24) and p.(Leu169Phe); iii) the number of sequences having leucine or glycine at position 119, and leucine or phenylalanine at position 229 of the MSA.

**B.** Frequency of occurrence of each amino acid in the MSA mentioned in panel A. Abbreviations and use of red boxes and font is as in panel A. Cells are colour-coded according to frequency values: 0-9, white; 10-19, pale green; 20-29, green; 30-39, dark green; 40-49, pale yellow; 50-59, yellow; 60-69, dark yellow; 90-99, blue; 100 dark blue.

# Supplementary Figure S4

**A**

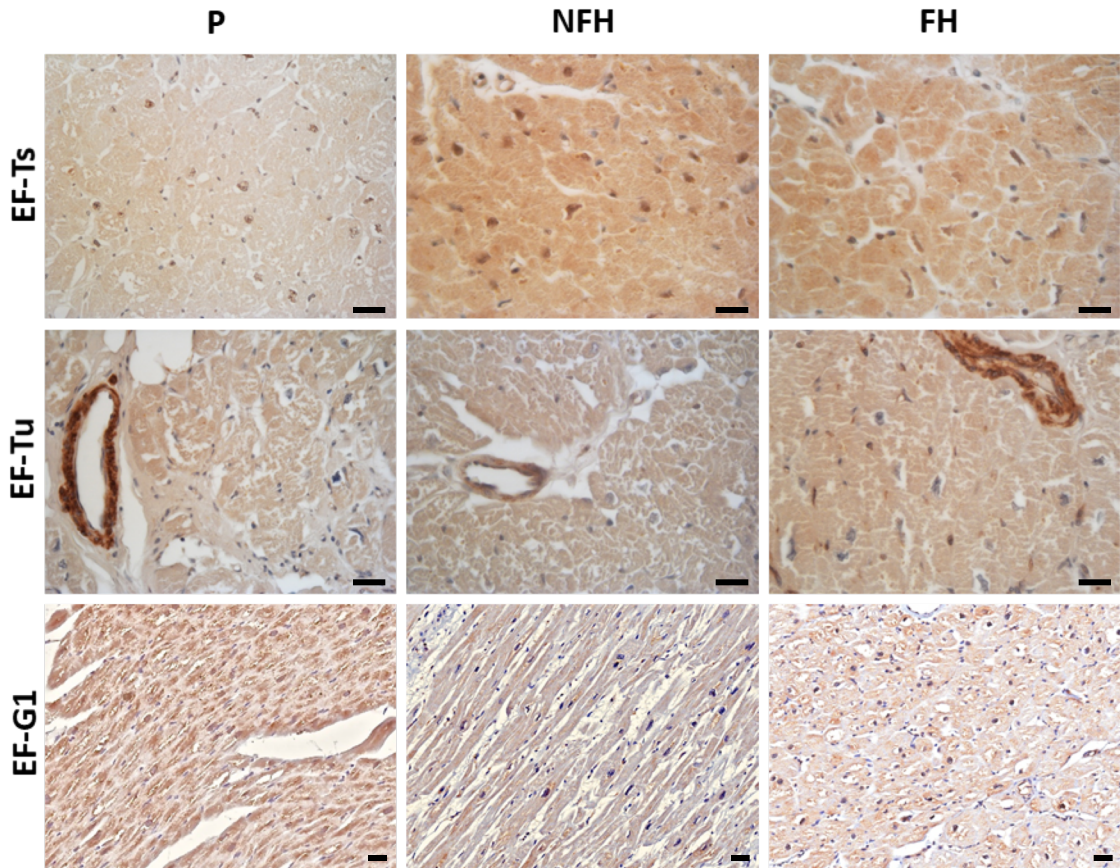

**B**

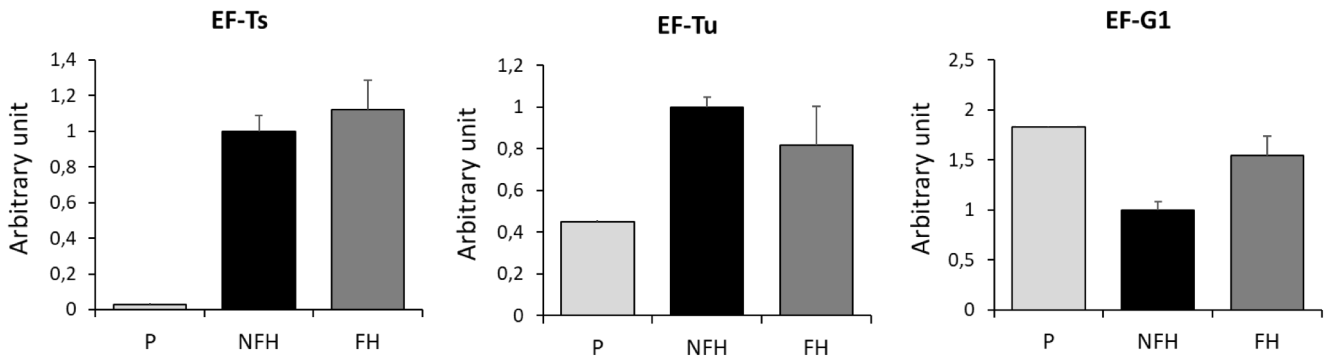

**C**

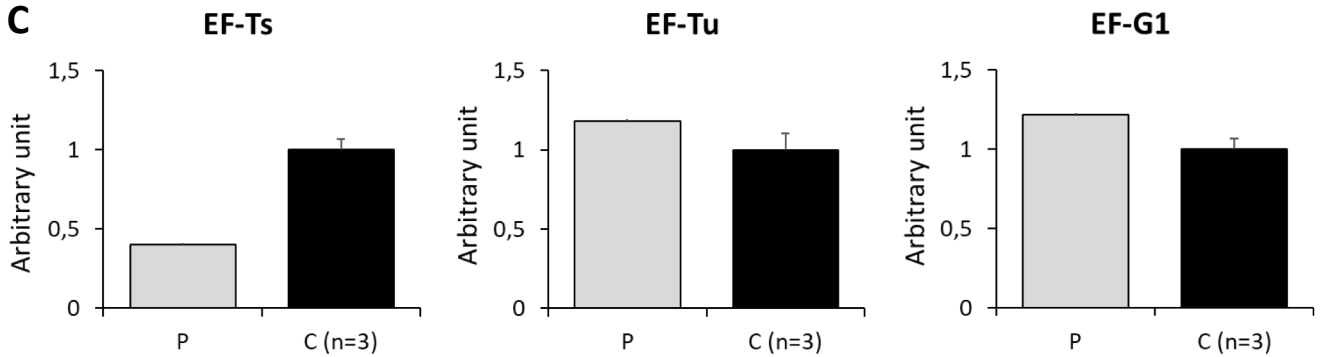

## Supplementary Figure S4

### Expression of EF-Ts and EF-Tu on cardiac tissue and fibroblasts

**A.** Representative images of immunostaining for EF-Ts, EF-Tu and EF-G1 antibody in patient (P), non failing (NFH) and failing heart (FH). Scale bar 50 $\mu$ m.

**B. and C.** Densitometry of Western blot of EF-Ts, EF-Tu and EF-G1 proteins performed on extract of heart homogenate from patient (P), non failing (NFH) and failing heart (FH) (**B**) and fibroblasts derived from and 2 wild-type donors (C) and patient (P) (**C**). Data are expressed as mean  $\pm$  S.E.M.

## Supplementary Figure S5

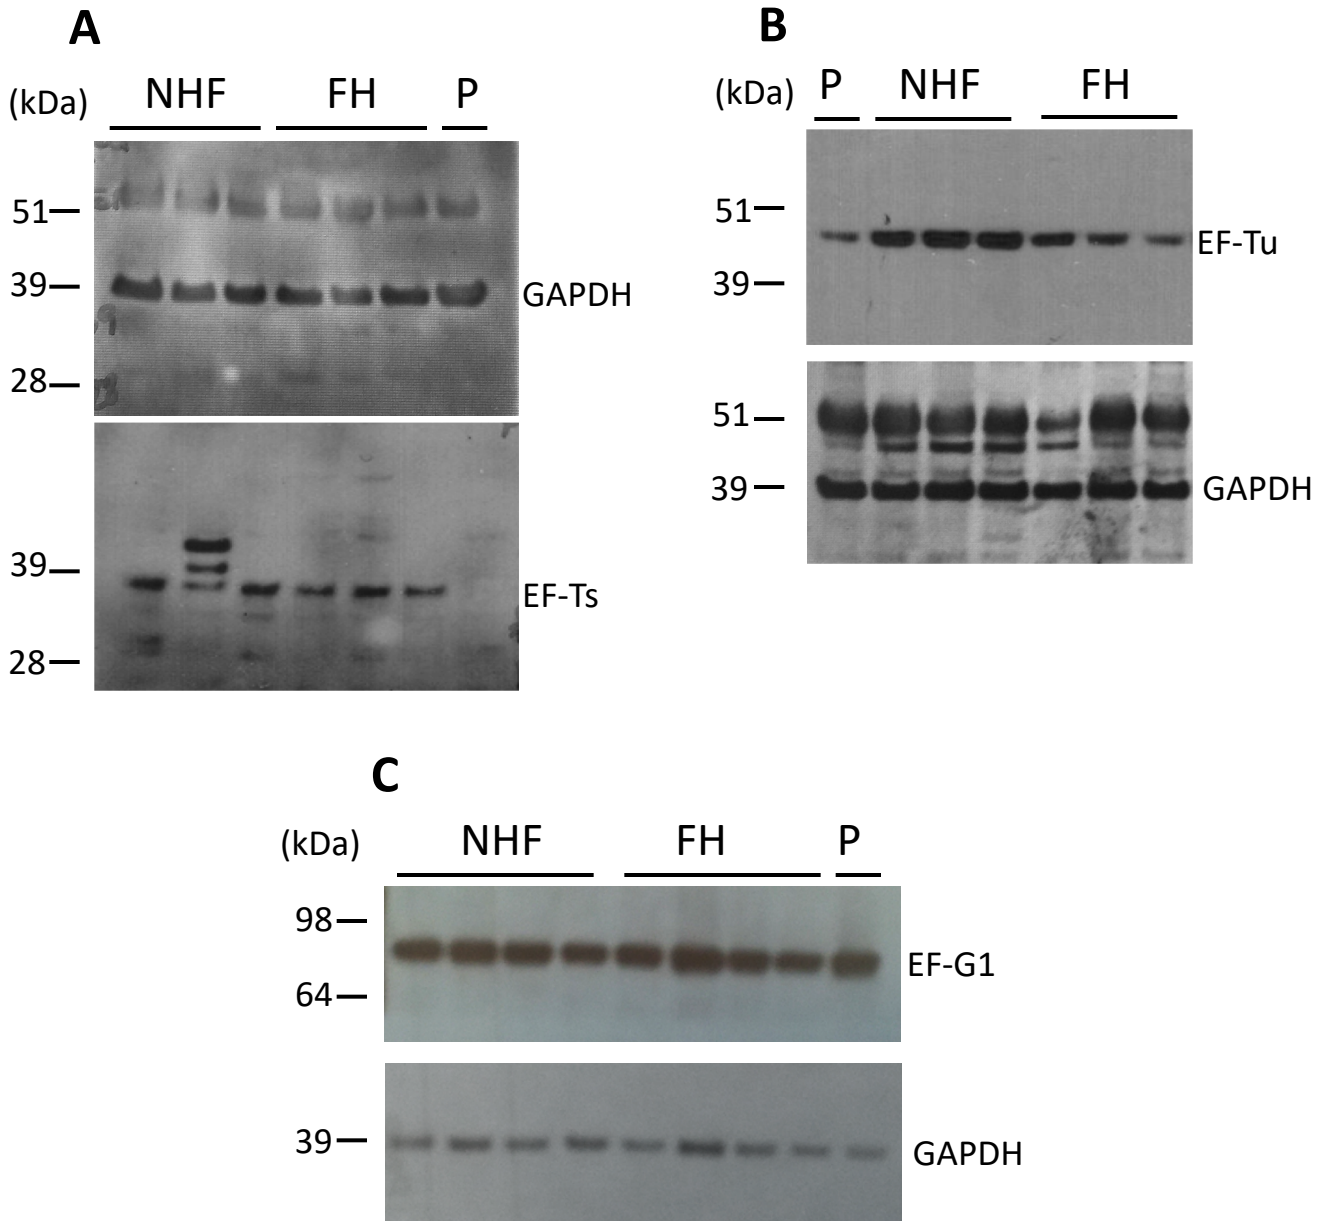

### Supplemental Figure S5

Full-length western blot images in Figure 5a for (A) EF-Ts, (B) EF-Tu and (C) EF-G1. GAPDH was used as a loading control for normalization after washing the membrane for 72 hours in PBS.



## Supplementary Table S1

| Patient | Sex | Age at transplant/<br>death<br>(years) | Clinical diagnosis | Heart weight (g) | Chamber diameter (mm) |    |
|---------|-----|----------------------------------------|--------------------|------------------|-----------------------|----|
|         |     |                                        |                    |                  | LV                    | RV |
| IC      | F   | 33                                     | iDCM               | 360              | 55                    | 50 |
| FH1     | F   | 58                                     | iDCM               | 410              | 54                    | 40 |
| FH2     | M   | 35                                     | iDCM               | 340              | 50                    | 40 |
| FH3     | F   | 26                                     | iDCM               | 370              | 56                    | 49 |
| FH4     | F   | 42                                     | iDCM               | 350              | 70                    | 32 |
| NFH1    | F   | 21                                     | DH                 | 320              | 20                    | 30 |
| NFH2    | M   | 39                                     | DH                 | 390              | 30                    | 30 |
| NFH3    | F   | 29                                     | DH                 | 300              | 20                    | 30 |
| NFH4    | F   | 34                                     | DH                 | 270              | 20                    | 25 |

### Supplementary Table S1

Demographic data and hearts measures of the index case (IC) and controls. FH=failing heart, NFH=non-failing heart, LV=left ventricle, RV=right ventricle, M=male, F=female, iDCM= idiopathic dilated cardiomyopathy, DH= donor heart

Measures refer to formalin-fixed hearts.

## Supplementary Table S2

| mtDNA polymorphisms | Protein variations |
|---------------------|--------------------|
| m.72T>C             | Non-coding         |
| m.264G>C            | Non-coding         |
| m.309insC           | Non-coding         |
| m.750A>G (MTRNR1)   | Non-coding         |
| m.1438A>G (MTRNR1)  | Non-coding         |
| m.2581A>G (MTRNR2)  | Non-coding         |
| m.3766T>C (MTND1)   | syn                |
| m.4769A>G (MTND2)   | syn                |
| m.5315A>G (MTND2)   | syn                |
| m.8668T>C (MTATP6)  | p.(Trp48Arg)       |
| m.8860A>G (MTATP6)  | p.(Thr112Ala)      |
| m.11440G>A (MTND4)  | syn                |
| m.15326A>G (MTCYB)  | p.(Thr194Ala)      |
| m.16093T>C          | Non-coding         |
| m.16519T>C          | Non-coding         |

### Supplementary Table S2

Sequence variations in mtDNA from the proband relative to the revised Cambridge reference sequence (GenBank accession no NC\_012920.1). All the identified changes correspond to previously reported polymorphisms listed in MitoMAP compendium ([www.mitopat.org](http://www.mitopat.org), Jun 28th 2018).
